# Supplementary material for: TOR Pathway-Mediated Juvenile Hormone Synthesis Regulates Nutrient-Dependent Female Reproduction in Nilaparvata lugens (Stål)
Source: PubMed Central journal article supplement (PMC4848894; doi:10.3390/ijms17040438), 2016-03-28
Supplement: ijms-17-00438-s001.pdf [file ijms-17-00438-s001.pdf]

# Supplementary Materials: TOR Pathway-Mediated Juvenile Hormone Synthesis Regulates Nutrient-Dependent Female Reproduction in *Nilaparvata lugens* (Stål)

Kai Lu, Xia Chen, Wen-Ting Liu and Qiang Zhou

**Table S1.** Primers used in this study. TOR: target of rapamycin; S6K: S6 kinase.

| Purpose         | Primer Name                               | Primer Sequence (5'-3')                  |
|-----------------|-------------------------------------------|------------------------------------------|
| qPCR analysis   | Q-TOR-F                                   | AACGCCATGGAGGTGACAGG                     |
|                 | Q-TOR-R                                   | ATGAGGCGCCAGTTGAGCAG                     |
|                 | Q-S6K-F                                   | AGGACACTGCGCACACCAAG                     |
|                 | Q-S6K-R                                   | CAATTCTCCGCCGCTCAGAT                     |
|                 | Q-Rheb-F                                  | ACGGCGGGTCAGGATGAGTA                     |
|                 | Q-Rheb-R                                  | TCCAAGGACTTGGATGAGGTGA                   |
|                 | Q-jmtN-F                                  | GAACCTGCAGGCCAAACACA                     |
|                 | Q-jmtN-R                                  | ACCACTCGGTTGGGCTGAAT                     |
|                 | Q-met-F                                   | AGTGGCAGCGAGCGATGATT                     |
|                 | Q-met-R                                   | TGAGGCCGACAGCAAAAAGGAG                   |
| dsRNA synthesis | TOR-Fi                                    | CAGTGGCCCGAGGTCTACGA                     |
|                 | TOR-Ri                                    | TCCCACGCCTGGTTCAAGTC                     |
|                 | TOR-T7Fi                                  | TAATACGACTCACTATAGGGCAGTGGCCCGAGGTCTACGA |
|                 | TOR-T7Ri                                  | TAATACGACTCACTATAGGGTCCCACGCCTGGTTCAAGTC |
|                 | S6K-Fi                                    | CATTGTGCGCAACCAGAAGG                     |
|                 | S6K-Ri                                    | TTTCGGCAGTGAAGGGAGGA                     |
|                 | S6K-T7Fi                                  | TAATACGACTCACTATAGGGCATTGTGCGCAACCAGAAGG |
|                 | S6K-T7Ri                                  | TAATACGACTCACTATAGGGTTTCGGCAGTGAAGGGAGGA |
|                 | Rheb-Fi                                   | GTTGATACGGCGGGTCAGGA                     |
|                 | Rheb-Ri                                   | GCATGTTTCCGTTGGCCTTT                     |
|                 | Rheb-T7Fi                                 | TAATACGACTCACTATAGGGGTTGATACGGCGGGTCAGGA |
|                 | Rheb-T7Ri                                 | TAATACGACTCACTATAGGGGCATGTTTCCGTTGGCCTTT |
|                 | jmtN-Fi                                   | CTCCAGGCCATTGTCCCTCA                     |
|                 | jmtN-Ri                                   | TTGGCCTGCAGGTTCTTTGG                     |
|                 | jmtN-T7Fi                                 | TAATACGACTCACTATAGGGCTCCAGGCCATTGTCCCTCA |
|                 | jmtN-T7Ri                                 | TAATACGACTCACTATAGGGTTGGCCTGCAGGTTCTTTGG |
|                 | met-Fi                                    | GACCCAAGCCACCCTCCAAG                     |
|                 | met-Ri                                    | TCCCCATCGTCAGCCAACCTC                    |
|                 | met-T7Fi                                  | TAATACGACTCACTATAGGGGACCCAAGCCACCCTCCAAG |
| met-T7Ri        | TAATACGACTCACTATAGGGTCCCCATCGTCAGCCAACCTC |                                          |
